# Supplementary material for: Graphene quantum dot modified Bi2WO6with enhanced photocatalytic activity by reinforcing the charge separation
Source: Royal Society of Chemistry journal article supplement (doi:10.1039/d0nj03569f), 2020-01-01
Supplement: d0nj03569f1.pdf [file d0nj03569f1.pdf]

## Electronic Supplementary Information (ESI)

# Graphene quantum dots modified Bi<sub>2</sub>WO<sub>6</sub> with enhanced photocatalytic activity by reinforcing the charge separation

Shaofeng Xiong<sup>a\*</sup>, Weian Wang<sup>a</sup>, Guangyue Fu<sup>b</sup>, Jian Hao<sup>c</sup>, Pingle Liu<sup>a\*\*</sup>, Zhengkang Duan<sup>a</sup>,  
Jiaxuan Wei<sup>a</sup>, Xiaoqi Zheng<sup>a</sup>

*a. College of Chemical Engineering, Xiangtan University, Xiangtan, Hunan 411105, China*

*b. Hunan Wuyuan Building Materials Co., LTD, Changsha, Hunan 410000, China*

*c. State Key Laboratory of High-efficiency Utilization of Coal and Green Chemical Engineering, Ningxia University, Yinchuan, Ningxia 750021, China*

---

\* Correspondence to: S. Xiong, Chemical Engineering & Chemistry Building, No. C205, College of Chemical Engineering, Xiangtan University, Xiangtan, Hunan 411105, China

E-mail: [shfxiong@xtu.edu.cn](mailto:shfxiong@xtu.edu.cn) (S.Xiong)

\*\* Correspondence to: P. Liu, Chemical Engineering & Chemistry Building, No. A213, College of Chemical Engineering, Xiangtan University, Xiangtan, Hunan 411105, China

E-mail: [liupingle@xtu.edu.cn](mailto:liupingle@xtu.edu.cn) (P. Liu)

# 1 Figures

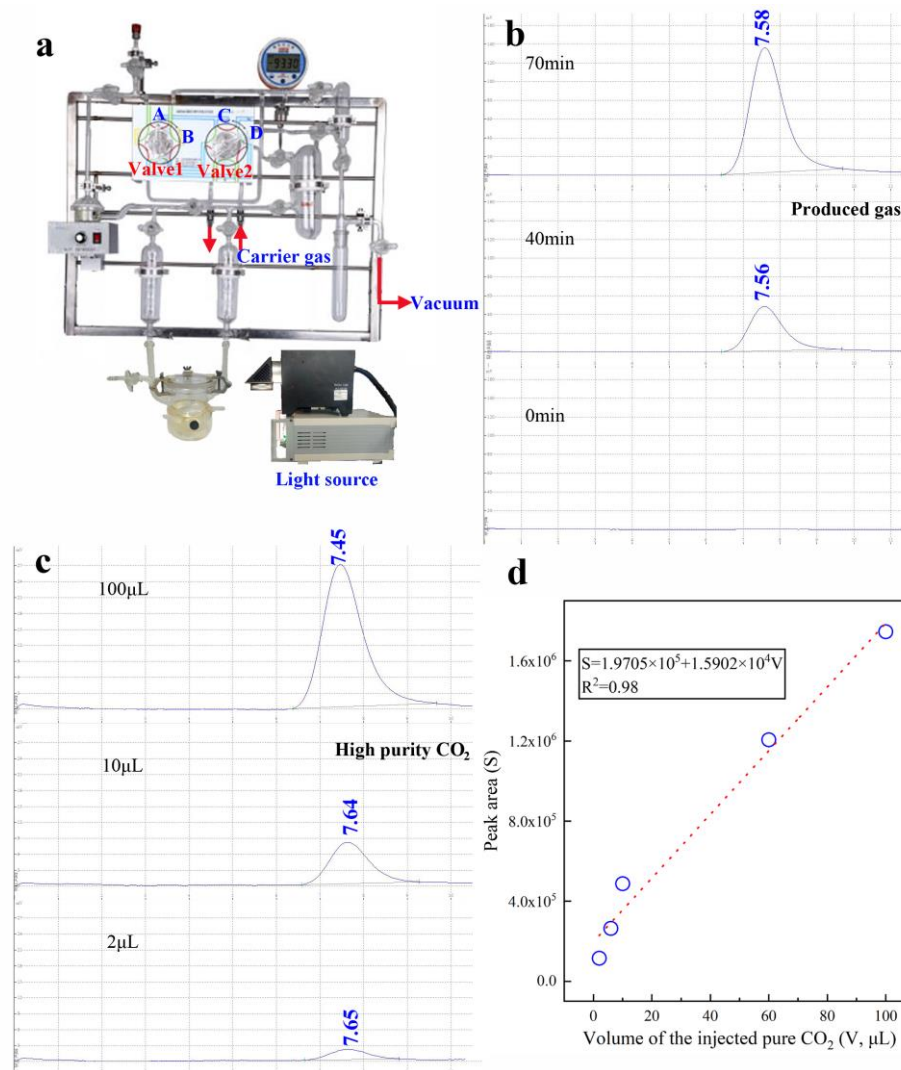

**Fig.S1** The experimental apparatus (a) and the results of GC analysis of produced gas (b) to confirm the final gas products by comparison to that of high purity CO<sub>2</sub> (c) and its standard curves of peak areas vs. volume of the injected pure CO<sub>2</sub>. Notes: Because the layout space is limited, only three corresponding GC curves of five points in Fig.S1d are provided in Fig.S1 c.

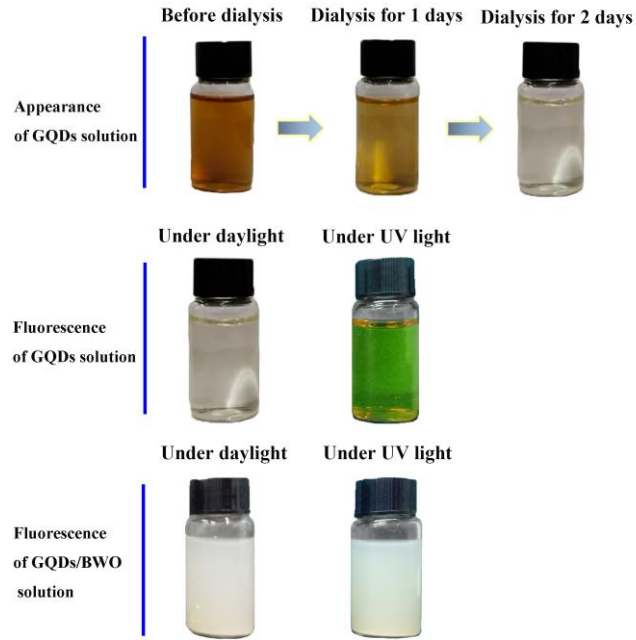

**Fig.S2** Photographs of GQDs solution before and after dialysis for various time, GQDs solution and GQDs/BWO solution under daylight and 365 nm UV light

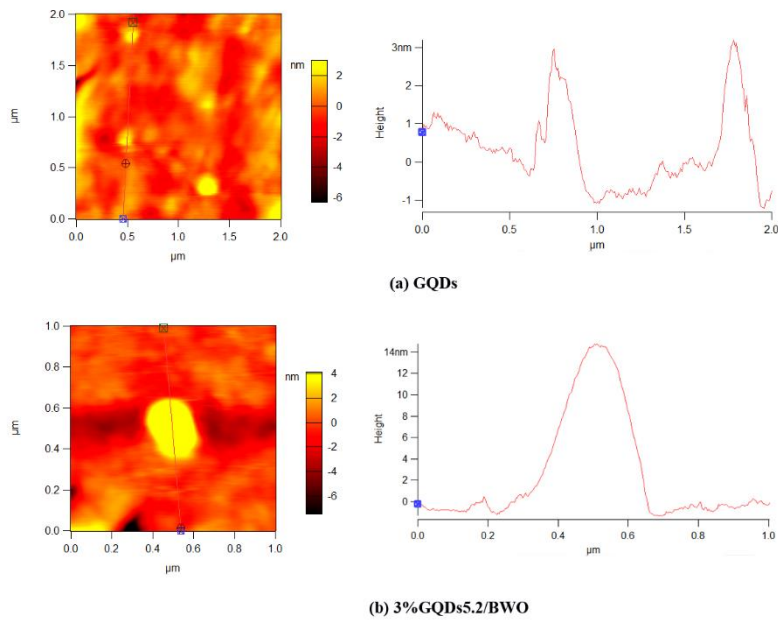

**Fig.S3** AFM image of GQDs (a) GQDs; (b) 3%GQDs5.2/BWO

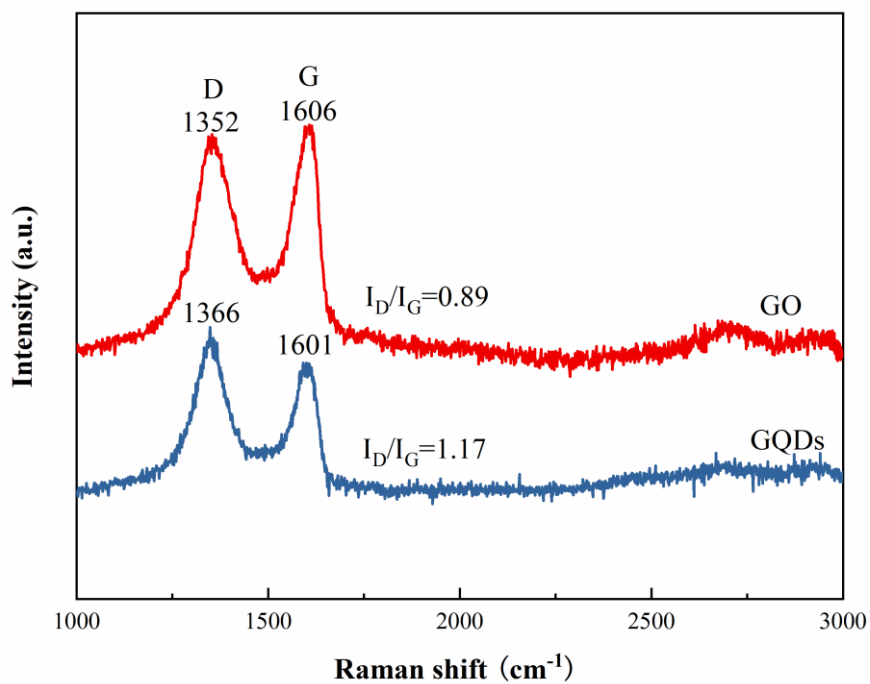

**Fig.S4** Raman spectra of the GO and GQDs

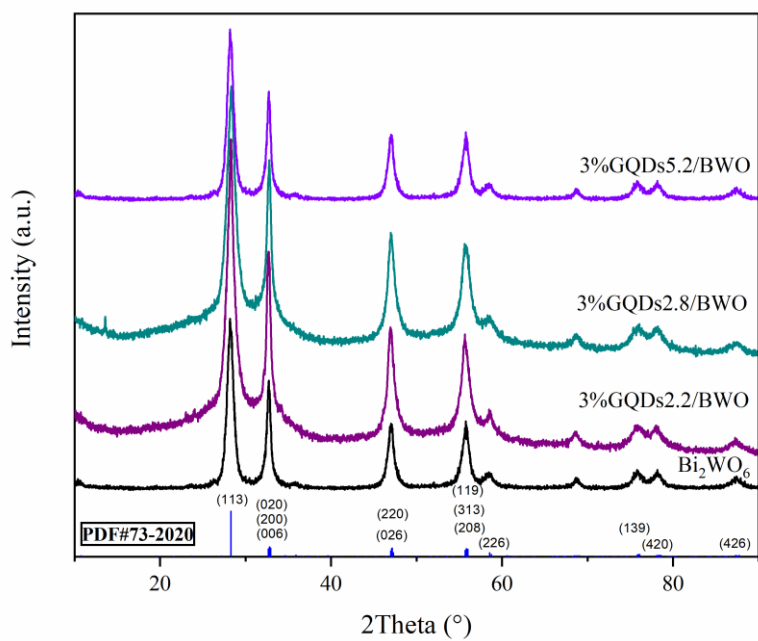

**Fig.S5** XRD patterns of  $\text{Bi}_2\text{WO}_6$  and 3%GQDs/BWO

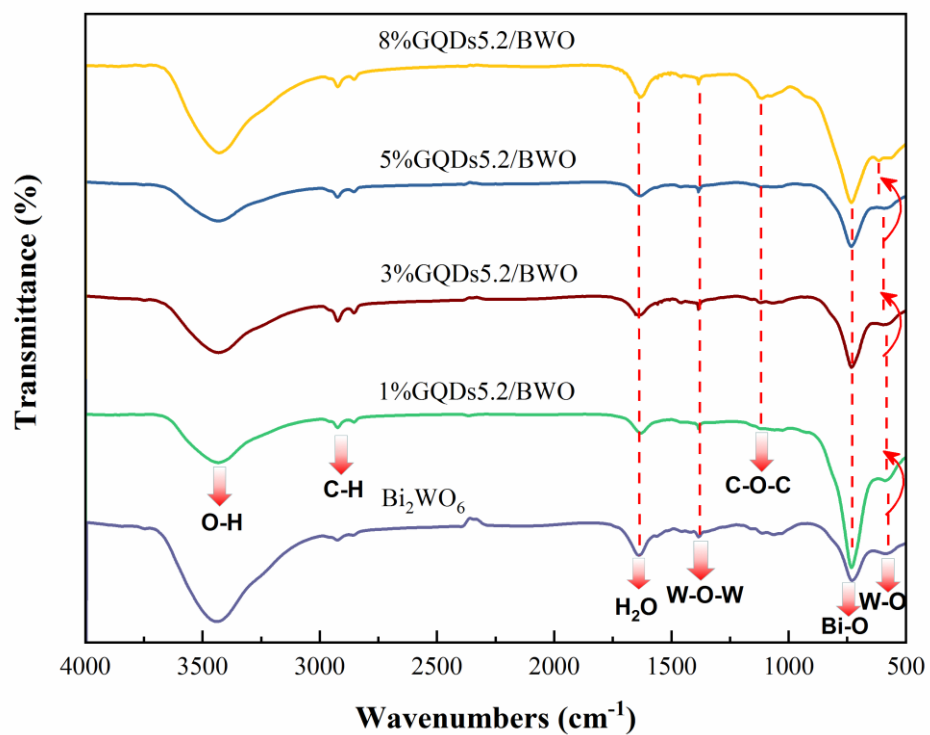

**Fig.S6** FT-IR of GQDs/BWO composites with different contents of GQDs

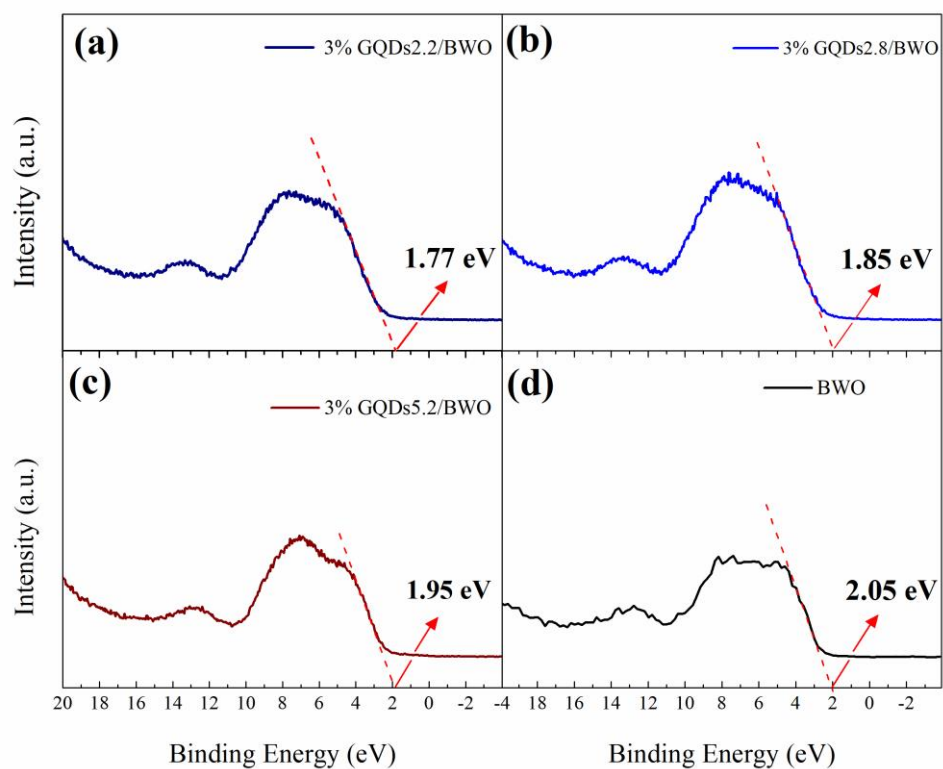

**Fig.S7** Valence band XPS spectra of GQDs2.2/BWO, GQDs2.8/BWO, GQDs5.2/BWO and BWO

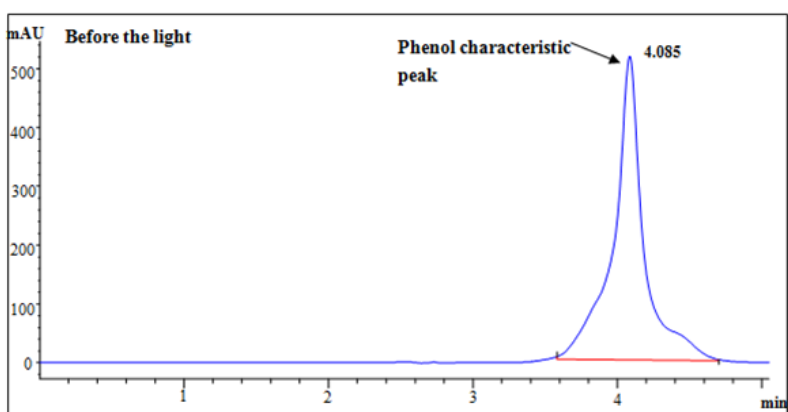

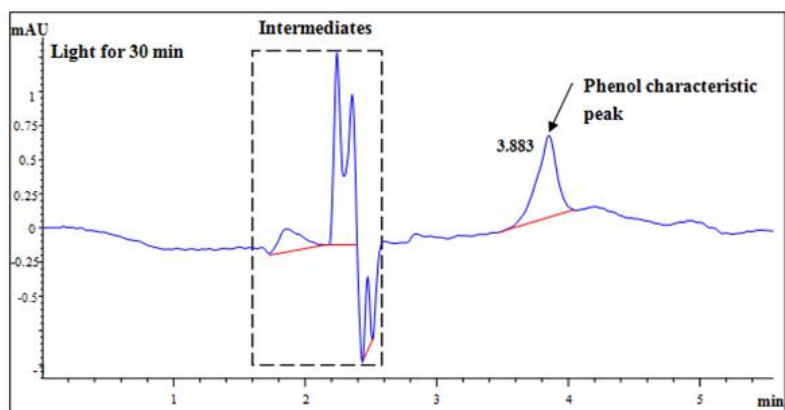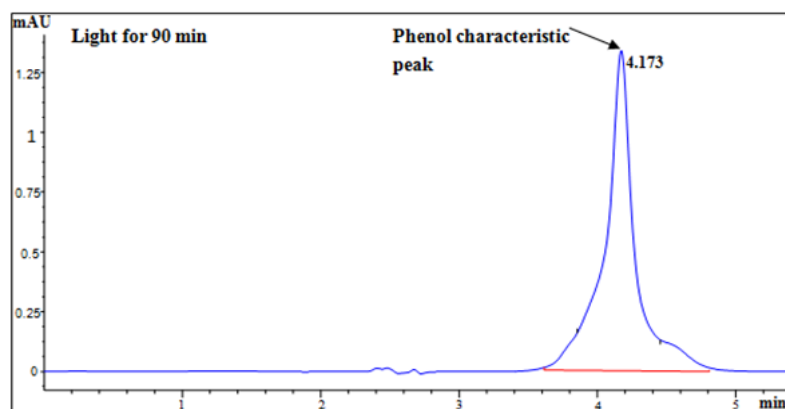

**Fig.S8** HPLC chromatogram of the phenol solution samples degraded at 0 and 30 min respectively over the 3%GQDs2.2/BWO sample

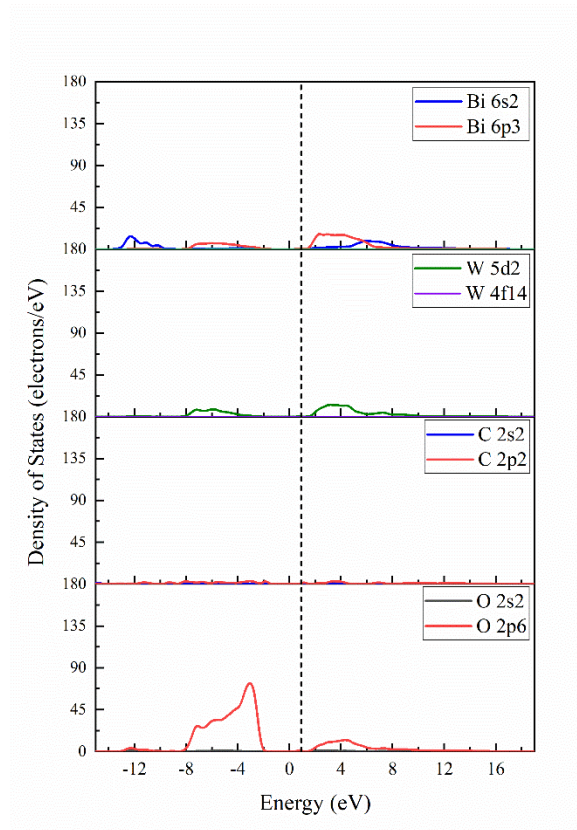

(a) PDOS for O, C, W and Bi atoms of GQDs/BWO

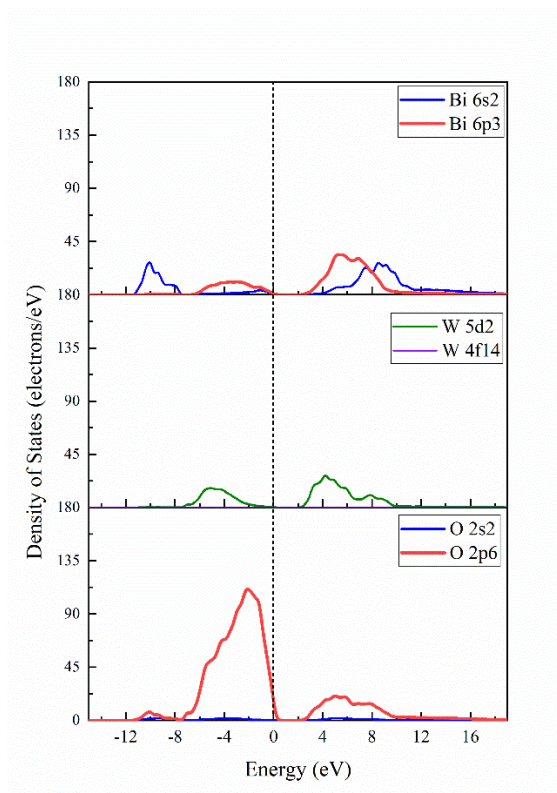

(b) PDOS for O, W and Bi atoms of BWO

**Fig.S9** PDOS of various atoms of GQDs/BWO and BWO



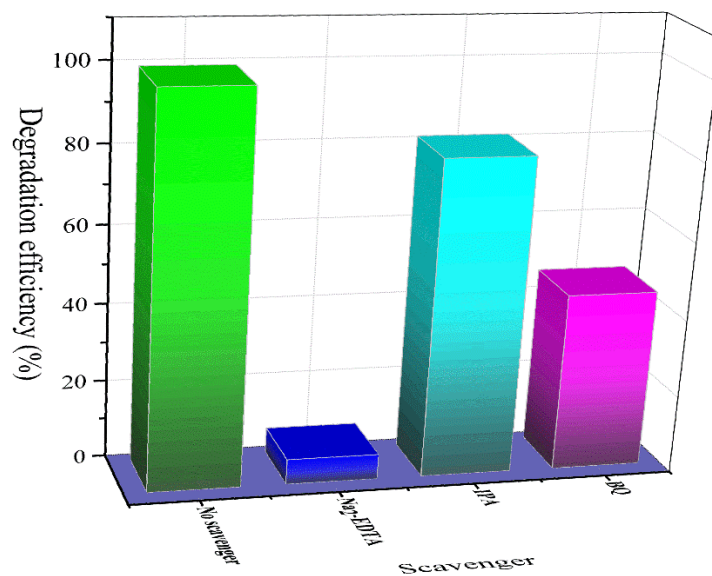

**Fig.S10** Effects of three scavengers on the photocatalytic degradation rate of pollutants in the presence of GQDs/BWO

## 2 Tables

**Table S1** The possible positions of GQDs over BWO (113) surface and the corresponding binding energies

|                      | 1                                                                                                                                                                                                                      | 2                                                                                                                                                                  | 3                                                                                                                                                                     | 4                                                                                   |
|----------------------|------------------------------------------------------------------------------------------------------------------------------------------------------------------------------------------------------------------------|--------------------------------------------------------------------------------------------------------------------------------------------------------------------|-----------------------------------------------------------------------------------------------------------------------------------------------------------------------|-------------------------------------------------------------------------------------|
| Number of positions  | 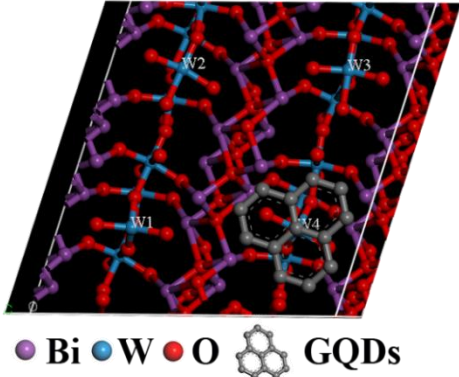                                                                                                                                      |                                                                                  |                                                                                    |  |
| Position description | Four W atoms in the top layer of Bi <sub>2</sub> WO <sub>6</sub> (113) surface were labeled. Structure No.1 refers to that the center C atom of the simulated GQDs with three benzene rings locates at the top of W 4. | Eight Bi atoms in the top layer of Bi <sub>2</sub> WO <sub>6</sub> (113) surface were labeled. The center C atom of the simulated GQDs locates at the top of Bi 5. | Seventeen O atoms in the top layer of Bi <sub>2</sub> WO <sub>6</sub> (113) surface were labeled. The center C atom of the simulated GQDs locates at the top of O 13. | The center C atom of the simulated GQDs locates among the top of W, Bi and O atoms. |
| Binding energy (eV)  | -1.2059                                                                                                                                                                                                                | 4.2489                                                                                                                                                             | -3.1040                                                                                                                                                               | 1.2850                                                                              |

**Table S2.** Comparison of the experimental and simulated lattice parameters of Bi<sub>2</sub>WO<sub>6</sub> single crystal

| Lattice parameters | Simulated value | Experimental value       | Error range |
|--------------------|-----------------|--------------------------|-------------|
| a                  | 5.572581        | 5.437260 <sup>[1]</sup>  | 2.49%       |
| b                  | 16.96147        | 16.430180 <sup>[1]</sup> | 3.23%       |
| c                  | 5.632385        | 5.458420 <sup>[1]</sup>  | 3.19%       |

**Table S3.** Comparison of the activity of various carbon nanomaterial-based Bi<sub>2</sub>WO<sub>6</sub> composite for photocatalytic degradation phenol

| Photocatalyst and dosage                                                                          | Light source                                  | Pollutant and initial concentration | Degradation Efficiency and time  | Ref.      |
|---------------------------------------------------------------------------------------------------|-----------------------------------------------|-------------------------------------|----------------------------------|-----------|
| N-doped g-C <sub>3</sub> N <sub>4</sub> -Bi <sub>2</sub> WO <sub>6</sub> , 100mg/100mL            | 300W Xenon lamp with a 420 nm cutoff filter   | Phenol, 10 mg/L                     | ab.35% (60 min), 93.1% (300 min) | [2]       |
| AgInS <sub>2</sub> QD-modified Bi <sub>2</sub> WO <sub>6</sub> , 500mg/100 mL                     | 1000 W Xenon lamp with a 420 nm cutoff filter | Phenol, 9.88 mg/L                   | ab.26%, 60 min                   | [3]       |
| TiO <sub>2</sub> /g-C <sub>3</sub> N <sub>4</sub> /Bi <sub>2</sub> WO <sub>6</sub> , 100mg/100 mL | 500W Xenon lamp with a 420 nm cutoff filter   | Phenol, 10 mg/L                     | ab.12% (60 min), 64% (210 min)   | [4]       |
| Bi <sub>2</sub> WO <sub>6</sub> /GQDs/WO <sub>3</sub> , 20 mg/100 mL                              | 300W Xenon lamp with a 420 nm cutoff filter   | Phenol, 20 mg/L                     | ab.80% (60 min), 99.8% (120 min) | [5]       |
| GQDs/BWO, 25 mg/100 mL                                                                            | 300W Xenon lamp with a 420 nm cutoff filter   | Phenol, 10 mg/L                     | 97.3%, 60 min                    | This work |

## References

- [1] K. S. Knigh, *Mineral Mag.* , 1992, **56**, 399.
- [2] D. D. Zhu and Q. X. Zhou, *Appl. Catal. B.* , 2020, **268**, 118426.
- [3] P. Parnicka, A. Mikołajczyk, H. P. Pinto, et al, *Appl. Surf. Sci.* , 2020, **525**, 146596.
- [4] G. L. Fang, M. Y. Li, H. F. Shen, S. L. Yang and J. Israr, *Mat Sci Semicon Proc.* , 2021, **121**, 105374.
- [5] Q. Zhou, Y. Song, N. J. Li, D. Y. Chen, Q. F. Xu, H. Li, J. H. He and J. M. Lu, *ACS Sustain. Chem. Eng.* , 2020, **8**, 7921.
